# Supplementary material
Source: publisher site journal article supplement (https://www.spandidos-publications.com/6076/downloadSupplementary)
Supplement: Supplementary file 1 [file downloadSupplementary]

## Sheet: Assays
Table SI. List of 48 single-nucleotide polymorphisms selected for screening.
PROJECT_NAME	ASSAY_ID	SNP_NAME	PLATE_NAME	PLATE_WELL_POSITION	ALLELE	ASP1_NAME	ASP2_NAME	SNP_SEQ	ASP1_SEQ	ASP2_SEQ	LSP_SEQ	STA_SEQ	AMP_GC	ID	MAF
20452FSTP21T1	GTA0048880	rs1019029	20452FSTP21T1_A01	A1	CT	C	T	AAAAAAAAAAAATGCGTGAACATATGTAATTAGAGAAAAATATTAGGGAAATTGCAAAATAATTTATTAGCCTTATTCAGATCTAGAGATGATCAAGGATAAGCTCAGCCTACTCAAGCAGAGATAACGTCTSTGTGGAAACGCTAAATG[C/T]CTAGTCTGCTTCTATCTTGTGTTTAAAGGAGAATCCTGTTGAAAATGAAGSCACTATCATGGTTAAGAGGATTTGAAATCTAAGATCAGGAGTGACTGCTTTCRGTGAATACAAGTTTCTAAGACTAGAAGATGGACATTCTAAAGTTCA	CTTTAAACACAAGATAGAAGCAGACTAGG	CCTTTAAACACAAGATAGAAGCAGACTAGA	GCTCAGCCTACTCAAGCAGAGA	CTTCATTTTCAACAGGATTCTCCTT	0.43	rs1019029*#	0.48
20452FSTP21T1	GTA0087363	rs10757274	20452FSTP21T1_A01	B1	AG	A	G	AACCCCTGCCTTTTTTTGTTTTCCATTTGCTTGGTAGATCTTCCTCCATCCCTTTATTTTGAGCCTATGTGTGTTTCTGCACATGGTGATGGGAGGTACTGGTATTACAAAAAGCTTCTCCCCCGTGGGTCAAATCTAAGCTGAGTGTTG[A/G]GACATAATTGAAATTCACTAGATAGATAGGAGATAGGGGTAGGGAATTCTAATCAGAGGGAATAGCACATGTAAGGCAAACAATACAGTGCATCTGGGAAAGCTATACAATTTTATTGTTATAGGACAAATGTTGGGGAATGTTGAGAGA	GGGTCAAATCTAAGCTGAGTGTTGA	GGTCAAATCTAAGCTGAGTGTTGG	CCCTACCCCTATCTCCTATCTATCTAGTG	AGCTTCTCCCCCGTGG	0.41	rs10757274	0.48
20452FSTP21T1	GTA0056989	rs10776839	20452FSTP21T1_A01	C1	GT	G	T	ACACCCACTTCCAGCCAACAACCCTCTTGCCTGGTGAAACTTCCCTGGGCTGCCRGACCTGCGAAATCCCAAAATGCCAAACATTCCCGCCTCACATGATCCCAGAGAGAGGGGACCCRGTGTTCCCAGCTTGCAGCTGAGGAGCCCRAG[G/T]TTGCCGTCAGATCAGAGCCCCAGTTGCCCGGTCTGCCGCAGCTCTGCTAGATAYGACGGGGTCAACAGGGCCCAAHGCCCTCATGCAGCCCGGCCCCGCCCCATGCTGGGGGTTCATACGGTGACCTCTTTCCCTTCCTTGACGGAGGCT	GGCTCTGATCTGACGGCAAC	GGCTCTGATCTGACGGCAAA	GTTCCCAGCTTGCAGCTGA	GGCAGACCGGGCAACT	0.61	rs10776839#	0.44
20452FSTP21T1	GTA0120490	rs11065987	20452FSTP21T1_A01	D1	AG	A	G	GGCCTCAACTCAGTACTCTCCTTTCCCAAAACAACAAAATCGAACTAGGAGCTGTGTCTTTTACATTCCCAAGTCCCAAAGTTAGGGGAGATAGTAGAGCAGAGTGGTGATAAGCCCAGGTTTTGGGGTTAGATGATGTCAAGATTGAGA[A/G]TTGACTGAGTGTGGTGGACTGCAACTGTCATCCCAGTGCTTTGGGAGGCGGAGGTGGGAGGATCACTTGGAATTCAAGGTCAGCCTGGGCAACATAGCAAGATCCCATGTCTACAAGAACAAACAAATTAGCTGGGCATGGTGGTGTACC	CAGTCCACCACACTCAGTCAAT	AGTCCACCACACTCAGTCAAC	AGCCCAGGTTTTGGGGTTAGA	GCACTGGGATGACAGTTGC	0.47	rs11065987*	0.40
20452FSTP21T1	GTA0048885	rs1109037	20452FSTP21T1_A01	E1	AG	A	G	ACCAAAACAAACACAACCTTTGGTGATAGGAATGATTATCCCGTATCCCACAGCTGAGGRAAGTGAGGCTCAGAGGGTAAGAAACTTTGTCACAGAGCTGGTGGTGAGGGTGGAGATTTTACACTCCCTGCCTCCCACACCAGTTTCTCC[A/G]GAGTGGAAAGACTTTCATCTCGCACTGGCACGACCTTGAGACCCCGGGTTCTGATGAACTGGGRGGACAGGTGCTTGGATGTCAGGGTGAAGGCTCTGCCATCATCTTTCAGCCCCCTGAGATGTCCCTTCAATATGGGCTGTTTCATCA	GCGAGATGAAAGTCTTTCCACTCT	GCGAGATGAAAGTCTTTCCACTCC	ATTTTACACTCCCTGCCTCCCA	GGTCTCAAGGTCGTGCCA	0.49	rs1109037	0.49
11996STP19O1	GTA0250538	rs11196033	11996STP19O1_A01	E1	AC	A	C	TGGCCCTAGAAAGTCAGCAAGGGGAGCATTCCTGTCTTCAGCACTTCCTTCATGCTTAAGTGACCTATTAGATGGTTTTTACATGATATTTTAAATATGA[A/C]AAAATAGTTTATAATATCTCAATGTCTTAATTGGTAGAAAAATATTGCCATCATCTCTCTTAGTGGAATAGCCCCTCTTTTATTTTTTGAGATGGAGTTT	ACCAATTAAGACATTGAGATATTATAAACTATTTTT	ACCAATTAAGACATTGAGATATTATAAACTATTTTG	CCTTCATGCTTAAGTGACCTATTAGATGGTT	TCCACTAAGAGAGATGATGGCAAT	0.24	rs11196033	0.43
11996STP19O1	GTA0093527	rs11781551	11996STP19O1_A01	G1	AG	A	G	AGGACTGTAGCATGGCGTGATGGTTAAGAGTGTGGGAAATGGAGTCATACAGACCCGTGTTTGAAACCCGCCTCGACATTTACTAGCTCTTTGACCTTTG[A/G]CAAGTTCAACGTCTGAGTCTTAGTTTCCTCATCTGAGGTCTTGATGAGCAAGCAGACATTCTGTCCATCCTGTCTGCATGTACATGTATATCCCATCTGC	AACTAAGACTCAGACGTTGAACTTGT	ACTAAGACTCAGACGTTGAACTTGC	GTTTGAAACCCGCCTCGACA	TCATCAAGACCTCAGATGAGGAA	0.43	rs11781551	0.46
20452FSTP21T1	GTA0118004	rs12571751	20452FSTP21T1_A01	F1	AG	A	G	TAGAATCAGACTGCCTGCCTTCCGAGGCCGAGCCCAGTCACTTGACTTCTCTGGGCCTTGTCTCCAGGGTCTCCATGGCGATTAAATGAAATAAATCTTGAACACTTAGTGCTGTCCGTGGTGTGTGCATGGTACGTATYCATTAGATGT[A/G]CACTGTTTTCCTCCTCCTCGGGTCTGTAGGTGTTTCAAGGCCCTGCCCTTCACCATCTGAGCAGTGAGGGCTGGAGTAGGGCAGTTAGTRTGGTGAGTCAGCCAGGAGGGTCCTGGAACTGTACTTGATGAGGCTCTCCCTGGACTGGGT	CGAGGAGGAGGAAAACAGTGT	CGAGGAGGAGGAAAACAGTGC	CTGTCCGTGGTGTGTGCA	CCTTGAAACACCTACAGACCC	0.48	rs12571751	0.46
20452FSTP21T1	GTA0026560	rs1294331	20452FSTP21T1_A01	G1	AG	A	G	CAAAATTTCCCTATTTTACTAGACATCCTTTACATATTGACCATCCTTGTMCTCTGGGGATGAACTCTCTTTGGAGTTTTATGTGTTGCTACATTTGTTTCTAATACCTAATTTGGATTTTTACATCATCATTCATAATTGTGATTGAGT[A/G]TAGTTATGGATTTTTATTGAATTTTTGGAATGTTTTATGCTACCTTCATACAGAGAATTTGGAAGGGTTTTTCGTYTTGTTTAGTGTTCTGAAATAGCTTAAGTTACATTGGAATTACCTATTTCATATTTCATAAAAGTTGATGTAAAA	AAACATTCCAAAAATTCAATAAAAATCCATAACTAT	AAACATTCCAAAAATTCAATAAAAATCCATAACTAC	AATTTGGATTTTTACATCATCATTCATAATTGTGATTGAG	CCAAATTCTCTGTATGAAGGTAGCA	0.22	rs1294331	0.40
11996STP19O1	GTA0007479	rs1333049	11996STP19O1_A01	C2	CG	C	G	TTCCAACTTGTGTATGACACTTCTTAGGCTATCATTTCATTCCAAATTTATGGTCACTACCCTACTGTCATTCCTCATACTAACCATATGATCAACAGTT[C/G]AAAAGCAGCCACTCGCAGAGGTAAGCAAGATATATGGTAAATACTGTGTTGACAAAAGTATGCAGAAGCAGTCACATTTATRCAGTAGTGAAGGAAATGT	TCCTCATACTAACCATATGATCAACAGTTC	TCCTCATACTAACCATATGATCAACAGTTG	GCTTACCTCTGCGAGTGGCT	TTATGGTCACTACCCTACTGTCATT	0.45	rs1333049	0.47
20452FSTP21T1	GTA0048871	rs1358856	20452FSTP21T1_A01	H1	AC	A	C	TTATCCGTACAAGTAGAGGCTGTTTTATCCCATTAGCAAAATTAGAAAAGATGATCTATGGCAAATAGAGTTATTTCATCATGGTACAAACATTATCACTATAACTGAATTCCTTAAATTAGAAAAATAATATTTGAACCCTTCAAACAG[A/C]TATGTACACAGGATGCTTGTAGTATAAGTGCAGTTTATAAGATAATTTTTAAGTAKTGGAGAAAGAAATAACACTGCCAGCAAAATTAAATACTTTAGTTAATAAAGTCTTACTCTTCTGGTTTCTTTAGTCATAAAATAATACTATCCT	CACTTATACTACAAGCATCCTGTGTACATAT	ACTTATACTACAAGCATCCTGTGTACATAG	ATTCCTTAAATTAGAAAAATAATATTTGAACCCTTCAAAC	CTGGCAGTGTTATTTCTTTCTCCA	0.29	rs1358856	0.45
20452FSTP21T1	GTA0281561	rs136147	20452FSTP21T1_A01	A2	GT	G	T	GTATASATGACTCAATATTGTATATTTAAGGGAGTAGAGCACAGTCATTGAAAACATGGGGTTGAAGCAGAAGTCCTGGCTCTAGCACTATTGTAAAAACACTGGCAAGTTCCCTAACTTTTGTGGATTCCTCTGTGTTTGAATGGGAAA[G/T]TGGTACCCATCTCCTGGCCTGTGTGTGATCATCGAATGAGAYACATGTAAGAGGCTCTGCACATCGCAGACATGCAATACACACTGGCTATCACCAGCTAGTTATCACACATGCTCCCAGGCCCTGGTCATTGTCAGAACCTTCCTCCCC	GATTCCTCTGTGTTTGAATGGGAAAG	GATTCCTCTGTGTTTGAATGGGAAAT	ATCACACACAGGCCAGGAGAT	GGCAAGTTCCCTAACTTTTGTGG	0.49	rs136147	0.49
20452FSTP21T1	GTA0048888	rs1410059	20452FSTP21T1_A01	B2	CT	C	T	AACATAAGACACCTTACCTGCTACTCCAGGCAAACATAATCTGTGTCAAAGGGAAGATGCTTGAACTCCCCAAAACAAGAGTGGCTTCTAAATTCTAAGTTCAGCTGAAGGTAGACGGGAATAGACCAGGGAAACATCTAGCATTTTTCT[C/T]CAATGGGACTGAGCTGYGAAATTCAAAGCTAGAAGGATATCCAAGGCCGTGGGTCACATTGGGCCTGGTGCTGACCTAACTACACTGCACAGCACTAGAGATTTCAGAACAGGCCCCAGCTCAGGATGTAACGGTTCCCAGCTTTGATGT	CCAGGGAAACATCTAGCATTTTTCTC	CCAGGGAAACATCTAGCATTTTTCTT	ACGGCCTTGGATATCCTTCTAGC	TGAAGGTAGACGGGAATAGACC	0.45	rs1410059	0.49
20452FSTP21T1	GTA0026514	rs1498553	20452FSTP21T1_A01	C2	CT	C	T	TGTGTGGTGCATTCAGTTTTTCTATTGGCCCACGTTTTCTGGTATCTTGTCAGGACCTAATATTACTACTGTTTTCTCTCAGCTGCAATTAATACTTCATGAGATAAATCAGACCAGGATGAAAGTTCACTTCAGATGTTCAAAGCCAGA[C/T]GAGAATAAAAGGATGGCTATGAGATCTATGGAAGTGCTGAGAAGGGAAGAAATAATGGACAGAGAACAGGTCTCTGGATAAATGAGTTCATTCACTTTGTCCATTGTGGTTGACACTCGGACTCCACTCTGTGCACTCCAGAAAAAACAC	CACTTCAGATGTTCAAAGCCAGAC	TCACTTCAGATGTTCAAAGCCAGAT	CACTTCCATAGATCTCATAGCCATCCTT	TCAGACCAGGATGAAAGTTCACT	0.42	rs1498553	0.44
20452FSTP21T1	GTA0026521	rs1523537	20452FSTP21T1_A01	D2	CT	C	T	AACAGGGGAGTTAGAAGCCCCCAAAGTGAGGATCCCAGTGCTTTTTTTTTCTGAAGCCCTTTCATATTTTATGCCTATAGAAGCTTAGGGTCTTAATACATTCATTTCTGCRTGGGTGGGGTTTCAGTCTGCAACAAGATCTTGTAGGGA[C/T]GCTATCGCTGGCTATTAGGTGATCACAGTTCTGTGCATTGTCTCACCCAGTCCTCACAGTAACTCCAAAGACAGGTTGTATTATGATCCTATTCTATAGATGAAGGAACTTAGGAAAGTCACACATCCAGGCCATACAGGTAGAGAGTGA	ACCTAATAGCCAGCGATAGCG	CACCTAATAGCCAGCGATAGCA	GTGGGGTTTCAGTCTGCAACA	AGACAATGCACAGAACTGTGATC	0.5	rs1523537*	0.42
11996STP19O1	GTA0189117	rs1562902	11996STP19O1_A01	D2	CT	C	T	CTACAAGTGTGCATAACATAGGAAATGTGATCAGTCTTGGAGGTCAGTAATTGTAGTCTGCACCAAACAACCAGCTTATATCCAGGGACTCCCCCATGAT[C/T]GTGTTCATGGAAGATGTTACTACAATTCTTCCCTATCAACTGGTCTCATATGGACACTGAGTGAAGGGAAAGGAAAGTAACAAAATCCTCTRTTTAAAAT	GAATTGTAGTAACATCTTCCATGAACACG	GAATTGTAGTAACATCTTCCATGAACACA	CCAGGGACTCCCCCATGA	AGTGTCCATATGAGACCAGTTGAT	0.48	rs1562902	0.43
20452FSTP21T1	GTA0117930	rs163184	20452FSTP21T1_A01	E2	GT	G	T	ATTAATTATCCTTCGCGGAGCTGYGCGGGGGCAGCTCTCCCAAAGCAGTCAGTCATTCACACTTCAGTATGAATGAGTCTCCGGGTACTTTGCTCAGTAACGGACTGGACCAGCGCGGCCTCCACGCCAGGGACTGGGGCAAGGGTGGAG[G/T]TTGGAGTAAAGAGAGAGGCAGGGCAACCCCTTTCCACAGACACTTTACCACCTCCCCACATTGACAAGCTGGCTCCCCAGGGCCACCCGGAGCCCCTTCCTCAGATCCTGTCCCCATTGGCATGGTCTCAGCCCCTCCTGCCCCAGTACC	CCTGCCTCTCTCTTTACTCCAAC	CCTGCCTCTCTCTTTACTCCAAA	CCTCCACGCCAGGGACT	CTGTGGAAAGGGGTTGCC	0.64	rs163184	0.47
11996STP19O1	GTA0018952	rs1800795	11996STP19O1_A01	B3	CG	C	G	AATAAAAGAAAAAAAGAAAGTAAAGGAAGAGTGGTTCTGCTTCTTAGCGCTAGCCTCAATGACGACCTAAGCTGCACTTTTCCCCCTAGTTGTGTCTTGC[C/G]ATGCTAAAGGACGTCACATTGCACAATCTTAATAAGGTTTCCAATCAGCCCCACCCGCTCTGGCCCCACCCTCACCCTCCAACAAAGATTTATCAAATGT	GCAATGTGACGTCCTTTAGCATG	GCAATGTGACGTCCTTTAGCATC	AGCTGCACTTTTCCCCCTAGT	GGGCTGATTGGAAACCTTATTAAGA	0.5	rs1800795	0.46
11996STP19O1	GTA0251807	rs1867148	11996STP19O1_A01	C3	CT	C	T	GTAGTCAGAGCACTGGGAGCTTCTCTCTCCCCCAGGCGGCCCCCAGCCCAGGGAGCCTGTGCCTGTGGGAAGCCCAGGAGTCACTGCCCTGGAGCCTGTG[C/T]TTTGTGCYTGGCCCTGCGCTCAGAGCTTTGTAGCCATTCTCACCTCAGTCCTCACAGCTGCCCAGGGAGGGACCTTTCTAGAGAGGAAGCCAGGCCCTGG	GCCCTGGAGCCTGTGC	GCCCTGGAGCCTGTGT	GAATGGCTACAAAGCTCTGAGCG	GGGAAGCCCAGGAGTCAC	0.6	rs1867148	0.48
20452FSTP21T1	GTA0056986	rs1872575	20452FSTP21T1_A01	F2	CT	C	T	TCGTCTCACACCATTTCCCCTCAAGCCTCAATCCAATTCATGGGTCCCTCAGAATCTCATCACTCCCACTTCAAGGCTGTGCCCTCACAGTTAAAGCTTTTGTCTTTGACTAAATGAATCTCTATCAACTAAAAGAATTAGTCTAGAAGT[C/T]TTAAAGGTCACAGTTCAATTCTCTCTGATCAATCCAGGTCATTTAAGTCTTTTGAGGAAATCTCTTCACCCTCATGTGGGCAGTTTGGTACAAAGATTCTTTATTTAAGCAGACCTTATRTCCAAATATAAATAATTAAAGCTCAGATTA	TCAGAGAGAATTGAACTGTGACCTTTAAG	TCAGAGAGAATTGAACTGTGACCTTTAAA	CTAAATGAATCTCTATCAACTAAAAGAATTAGTCTAGAAG	CCTCAAAAGACTTAAATGACCTGGA	0.31	rs1872575	0.49
11996STP19O1	GTA0250532	rs1879417	11996STP19O1_A01	D3	CT	C	T	GAACGATATGAGAGAGAGCCTGGCACATTCTAAGTAAGTGTTTCACAAAATTTTCATCCCTCTTCCTGGGCTGGCTCTACTCGGCCTTCAAGTCTTAGCG[C/T]GAACTCCCCCACTTGGGAGCAGCCCCAAGCACTCTGCATGTCCCTCTTCAGAACATACAAGTTCTGTGATATTTACTTGTTCAATGCCCTCATGAGGGCA	GGCCTTCAAGTCTTAGCGC	CGGCCTTCAAGTCTTAGCGT	AGAGGGACATGCAGAGTGCTT	TGGGCTGGCTCTACTCG	0.61	rs1879417*	0.45
20452FSTP21T1	GTA0057019	rs2291395	20452FSTP21T1_A01	G2	AG	A	G	GCCGAGTGATGCCATCTGACCTCAATTTAATGGCTGACAACTCACAGCCTGAAAATGAAAAGGAAGCTTCAGGTGGAGACAGCCCGAAGGTAAAGGCTTTGTAGCCTTGAAGCAGCCCCTGGGGGACAGTGTGTAGCCACAGGGCCCTCA[A/G]TGTCACCTGCCTGTCACTCACCTGCCTGTCCAGTGACAGCCCTGCCAGGGCATCGGTGGGGATGTGGGCTTGATTCTGGTGTTGCTGCTGTGTTCTTGGTATTGGGGCTTTTTGCAAGTGTACTCGTTTAGTCATTCAACGCACATCTTA	GAGTGACAGGCAGGTGACAT	AGTGACAGGCAGGTGACAC	CCTTGAAGCAGCCCCTGG	ACTGGACAGGCAGGTGA	0.62	rs2291395	0.45
20452FSTP21T1	GTA0048873	rs2503107	20452FSTP21T1_A01	H2	AC	A	C	ATGTGGTTCTTTCAATAAGTTATCAATAAAAAATAATAATGAATAAACCTGTATTCACCCAAATATCATAGTTTGATAATCCAAAAGGAGTGTTGTATCCAAATAAGTAATTATATTTATTCAGAAAATCTTGTGTTCATATTTTGCTAT[A/C]TATACCTAACTTTCTCAAGTTGCCTAAATGGTTGTGGAGACCTAGCCATTGTCGGCTCTACTTGCAAGCTTTAACACATGAACAAATGAGAAACACTGACTCTGAATATTTTCTTGGGTTGACTGGGCAGAATTTTAGAGAGACAGCCAA	CATTTAGGCAACTTGAGAAAGTTAGGTATAT	CATTTAGGCAACTTGAGAAAGTTAGGTATAG	ATTATATTTATTCAGAAAATCTTGTGTTCATATTTTGCTA	TGGCTAGGTCTCCACAACC	0.25	rs2503107	0.42
20452FSTP21T1	GTA0048875	rs279844	20452FSTP21T1_A01	A3	AT	A	T	TTAAAGGGAGTAAACATCATTAATTTACTTTTGATACAAAGGGTTTGCCATGTTTGTCACAGGTTTTCTTAATGAACTACATTTACAAATGGCAACTTCTGATAAAGGATAACAGATTAAGTTCAGTGTCAATTTTGACCAGATATTAAA[A/T]CTCACAACTMTCTAAACTTCCTTGATATTAACTACTGAACTAATTAATATCCCAGTAGCTTCTGGAGWTTCTAAGAGATAATGCACTCTGTGTTTTTGCAGAGGAAGAAAAGTATTAACTGGAGAAATCAACATAATCAAGAAACCAAGG	AAGTTCAGTGTCAATTTTGACCAGATATTAAAA	AAGTTCAGTGTCAATTTTGACCAGATATTAAAT	ATATTAATTAGTTCAGTAGTTAATATCAAGGAAGTTTAGA	GGCAACTTCTGATAAAGGATAACAGA	0.27	rs279844	0.46
11996STP19O1	GTA0164729	rs2802292	11996STP19O1_A01	B4	GT	G	T	TGAGTGACAGAGTGAATATAAACCCAGCCTGCTCACTCCATTTCCTAGTTTTCTCACCTCTACCAGGGTCTCTGTTGCTCACAAGAGCTCAGGGCTGGGA[G/T]AAGCCTCTGTGTGACAGATGAAGGGGTCCTGCTGCTCTCTAGGGAAGAATCGGTCCCAAATTGCTCAAGGGAGTAAGGTGGTTTCGTTGAGGAGCATCAG	TCATCTGTCACACAGAGGCTTC	CTTCATCTGTCACACAGAGGCTTA	CCAGGGTCTCTGTTGCTCACA	AGCAGCAGGACCCCTT	0.57	rs2802292	0.47
20452FSTP21T1	GTA0048865	rs315791	20452FSTP21T1_A01	B3	AC	A	C	TGAACAAACATAAAGTCATCGATCTCATGGAGACTAATAATGATAATGTTATAATAATGGWGATGATGATGGTGATTAATGAGCATTGAGTATTTACTTTGTACCAGGGGTGTTTCCCTTACTGTAAAATGAGGAAACTAATGCATAGGC[A/C]AGTTTCATCCTTATGTGGCAGACAGAAATTAACAAAGGAGCAAATAAGAGGTGCGAGGGCTCTATGTACAATTTGGTAGCCACTAGCCTGGCTATTTAAATCTAAAGTCATGGAAATGCAATAAAATTCAAAATTCAGTTCCTTGGTCAC	TGTCTGCCACATAAGGATGAAACTT	GTCTGCCACATAAGGATGAAACTG	TCCCTTACTGTAAAATGAGGAAACTAATGCATA	GCACCTCTTATTTGCTCCTTTGTT	0.39	rs315791*	0.49
20452FSTP21T1	GTA0026549	rs321198	20452FSTP21T1_A01	C3	CT	C	T	CTTACACACCTACAATTTATCCCCCTTCCCAAACTCTTCATATACATACCACATACAATTCTCAAATGAAATAACTAAATAAGGAAGCTGTGTTCCTTTCTCCTACACACAGGCTTCAGGTTACCTGTTTTCCTTTTGTGATTCCACTTC[C/T]GTGTGAAGCAAGCAGTGCTTGTTTTAATCAGATTTCACCTGTATAAAGTGTGGAGAAACGCACATTAGCATTTTTTTTTGGCATTTTTCCCAGTCCCTTTACCAAAAAAGATATCTCAGCATTCTATTAACACTCCATAGGGGCAAAGTT	GCACTGCTTGCTTCACACG	GCACTGCTTGCTTCACACA	CTCCTACACACAGGCTTCAGGT	ACAGGTGAAATCTGATTAAAACAAGCA	0.49	rs321198	0.41
20452FSTP21T1	GTA0026553	rs338882	20452FSTP21T1_A01	D3	CT	C	T	GGCAGCRCTGTGCTCTGGGCCCTGAAGGAGCTCTGAGCGGGGAAAGGTCGCGCAGTCAGATGGGCGTGCTGGCGTCTGTCTTCTCTCTCTCCTGCTCTCYGGCTTCATTTTTCTCTCCTTCTGTCTCACCTTCTTTCGTGTGCCTGTGCA[C/T]ACACACGTTTGGGACAAGGGCTGGATTCTTCGGCTGGGATGTCTCTCAGAGCTCTTGACTTGGTCCCTTTGGCTGGGGCTTGCCGTGAGGTGTGGGCTGCGCCACGAGCACAGCTGGTAGAGAACCCGGCCAGGAGCGCAGCTCACGCCT	CTTTCGTGTGCCTGTGCAC	CTTTCGTGTGCCTGTGCAT	CCCAGCCGAAGAATCCAGC	TTCTCTCCTTCTGTCTCACCTTC	0.58	rs338882*	0.49
20452FSTP21T1	GTA0026501	rs3780962	20452FSTP21T1_A01	E3	CT	C	T	CTGGGTCCAAAAATGGGCATTGTTTGAGCTGTTTGTCTACTGGCAATGATGGATCTGCATTGATCCTTCCAAACCCTCTGTCCTGGTTCTGTGACTGGTGGTGTGTATTCTGCGGTAGCGGGCTTTTGAAGAAAAACACTAACCTGTCCT[C/T]ACGGGTGAAAGCTGATATCTTGACCTTGTTCATCCCATGTTTCTTTGTTTTTGAGGATTATTATTGTTATTTTTAABGTATCTAAGTTTTTTAAAAGTTGTCTTTTAACTTAAAAAATTATGTCATTTTTTTCACAAATTGTTAGATTGG	TCAAGATATCAGCTTTCACCCGTG	GTCAAGATATCAGCTTTCACCCGTA	CTGCGGTAGCGGGCTTTT	AAAGAAACATGGGATGAACAAGGT	0.48	rs3780962	0.46
11996STP19O1	GTA0102813	rs3825807	11996STP19O1_A01	H4	CT	C	T	AGAGCTCACTGAGGAGAGGCCCTGGAGACGTGTGCCCTGGGCCTGTCCACTGGCAGCTAACTCCACCCCATCTGGGCCTCCAGTGTACCCAGAGCTGGAG[C/T]CTCGACGGGAGCGTTGGGAGCAGCGGCAGCAGTGGCRGCGGCCACGGCTGAGGCGTCTACACCAGCGGTCGGTCAGCAAAGAGAAGTGGGTGGAGACCCT	GTGTACCCAGAGCTGGAGC	AGTGTACCCAGAGCTGGAGT	CGCTGCTCCCAACGCT	CAGCTAACTCCACCCCATCT	0.68	rs3825807	0.40
20452FSTP21T1	GTA0026531	rs4364205	20452FSTP21T1_A01	F3	GT	G	T	AGGTGTTGGCRAGGTTATGCAGCATCTGGAATTTTTATACACCGCTGGTGGGAGTGTAAAATGGTATAATTACTTACAAAGTTAAACAATACTTGTAACCCAGCAATTCCAGTCCTAGATATCCACCCATGAGAAATATATCCACAAAAA[G/T]ATTGAGCAAGAATATGCATAGCAGCTGTATTCATAGTTGCCCCAAACTGGAAACAACCCAAATGGCTATCAAATGGTGAATGAATACATTGTGTATCTCTACAATGGAATACTGCTCAGCAATAAAAGGGAACAAACTACTGATATAGGC	GCTGCTATGCATATTCTTGCTCAATC	GCTGCTATGCATATTCTTGCTCAATA	CCAGTCCTAGATATCCACCCATGAGA	GGGCAACTATGAATACAGCTGC	0.4	rs4364205*#	0.41
20452FSTP21T1	GTA0057004	rs521861	20452FSTP21T1_A01	G3	CG	C	G	CAAACCTTCTACCAGGCTGGTCCTGGGCTGGGCTCTGCTGCCAGCAGCTCCAGTTGGTACTTGGGTTACAYTGTCCCTGCTCCAACGCATCCTTCTAGTTAAATGATAACTGTAGGCCATAATACTCTTGAGTACATGGTTGACATTTGG[C/G]CATTTTATAGGTCCAGCAGATGGCTGTGGATTGGCCATTGGCTCTAGTTAGAATGCCAGTCATTTATCCAGGAAAATGTATTTTGTAGGCCCAGACTTCCAATCCATAACTTCTTACTTCAAACCTGATCCATGTGCAGATTGCAAACAA	CTTGAGTACATGGTTGACATTTGGC	CTTGAGTACATGGTTGACATTTGGG	ATCCACAGCCATCTGCTGGA	TGATAACTGTAGGCCATAATACTCTTGA	0.45	rs521861*#	0.45
20452FSTP21T1	GTA0057035	rs5746846	20452FSTP21T1_A01	H3	CG	C	G	CAGACAGGTCTAGAACATGCACTCCTAAAGGATACAAGAGCTGGAGCCTAGAGGAGCCCTGGCTCACAGCTGAGAAAGCTTGGGAAGCTGCATCCAGGCACTCAGGCCATGGCCTGCAGCGAGCCTGCCCCACAACCAAACCCACCCACT[C/G]TTTCACCTGGMAGCCAGCCTCTGAGTGCACGTGAGATGTGTGCGCACCTGCGGGAACTGACAGAGCCACAACTCGGTTCCAACAGCCAGTCCAAAGCACACTCAATTCCTAATTCAACTCAAGGGCTCTGGAAAGGCCTAAATTGTTGTA	CAACCAAACCCACCCACTC	CAACCAAACCCACCCACTG	TCTCACGTGCACTCAGAGGC	CATGGCCTGCAGCGAG	0.56	rs5746846	0.47
20452FSTP21T1	GTA0026491	rs576261	20452FSTP21T1_A01	A4	AC	A	C	AGAGAGAAAAAAACCTGAGGGTGCTGTTATAGAAGGTGCAAATGTGCAAATGGCCACTGTGAACAGCCAGTGGACCCTGCTGCACCTTTCCTCCCCTCCCATCAACCTCTTTTGTGCCTCCCCCTCCGTGTACCACCTTCTCTGTCACCA[A/C]CCCTGGCCTCACAACTCTCTCCTTTGCCACTATCATCAACAAACAAACAAACAACAACAACAAAAACCTCAGACTTCTCAAGAACAATACTGCAAACAAGATGAGAGAAAAATGCCTTTAAAATTCTGAAACAAATGGAGTTTGGTCCCT	GTACCACCTTCTCTGTCACCAA	GTACCACCTTCTCTGTCACCAC	AAAGGAGAGAGTTGTGAGGCCA	CCCATCAACCTCTTTTGTGCC	0.53	rs576261#	0.48
20452FSTP21T1	GTA0057010	rs590162	20452FSTP21T1_A01	B4	AG	A	G	TAAAGGCTTCATAATGGATGAAGATAGACTAGCATTAGATGATGGAATTTGAGAAATGTGGAAGGACATCTGAACAAGGTACCTTCTTGAGAAATTCCTCATACAAAGCACCCGATAGTATTTTATACCAACTATCAAATTAGGAGAACT[A/G]ACGGATAACAAAAACAGAGCTCTTTCAATAAAATTAGGTTTATATTTCTTTTATTTTAATGCTTTCTTTCCCCACTTAACAATGCGTCTAAAGTAAGTATTGACAACAGCTTGCATTTATTAAGCTCTTGCAATGTGTCAGGCCTGGTGC	GAAAGAGCTCTGTTTTTGTTATCCGTT	GAAAGAGCTCTGTTTTTGTTATCCGTC	ACAAAGCACCCGATAGTATTTTATACCAACT	TGAAAGAGCTCTGTTTTTGTTATCCG	0.35	rs590162#	0.44
11996STP19O1	GTA0250533	rs6584389	11996STP19O1_A01	H5	AC	A	C	TCATTAAGTGCGGAAGATGGGAGCCGGCAGACTTCAGATGGGACCAGTGGGTTGGGGGAAGAGGTCAGGAGCCTGCCCCTCCCTCCCTGCAGCCCCTCCT[A/C]CACCCTATTCCTGCTCTGGAAACTTGGCCACTCACACCCCGATTATCATCTGATTTGCATAGACACCCCCACCCCAGMCTTCCAGTTCCCTCGGCTCTCT	CCAGAGCAGGAATAGGGTGT	CCAGAGCAGGAATAGGGTGG	CCCCTCCCTCCCTGCA	GTGTGAGTGGCCAAGTTTCC	0.67	rs6584389	0.46
20452FSTP21T1	GTA0026562	rs6811238	20452FSTP21T1_A01	C4	GT	G	T	TTGCTTATCCCTCAAAGGGGAGGTGTTCTTAGCTCTCTGACCTCTGGGTTGATACAGAGGCCAAATTTATCCCAGGGAAGGAATAAGTACATTTGAAATAAGTCACTGAGAGGAGAAGACTGTGTGTTTTAAAGCCAGGTTTGTTTAAAG[G/T]GTTATGATAGTATTAAGATGTTCTTTCATTTTCATAGAAGTACTTCATTTGGCTAGAAGGTCAAATGCCTGGTGCTTTGAGGACCTGAACAGTTTCTGTTCCATGAACATACCGGACTCAGGAGTTCTTTTGCTCCAGATACTAAGTTAK	GTGTTTTAAAGCCAGGTTTGTTTAAAGG	TGTGTTTTAAAGCCAGGTTTGTTTAAAGT	CCAGGCATTTGACCTTCTAGCC	TCACTGAGAGGAGAAGACTGTG	0.34	rs6811238	0.46
20452FSTP21T1	GTA0048877	rs7205345	20452FSTP21T1_A01	D4	CG	C	G	ATTTAGGTTGTTTACACTTTTTGATTAGTGCAAATAATGTTGCTCAGAAAGCCTTTCTTAATCTGACTGTATACCCCAGGTGCACCCTTGGGTCATCTCTATCATAGAACTTATCTCACAGAGTATAAGAGSTGATTTCTGTGTCTGCCT[C/G]TCACACTAGACTTCCACATCCTYAGTGCAGGTGCCCTGCCAGTAAGTTGTTCACCATTGTTTCCCTATGATGTAGAAGAGTTCCTGGTTCATGTGACATGCTCAGCAAATATTTGAAATGAGTGATTGTAGGAGGAATGAATGGATAGTT	AGGATGTGGAAGTCTAGTGTGAG	AGGATGTGGAAGTCTAGTGTGAC	CCCTTGGGTCATCTCTATCATAGAACTT	GGCAGGGCACCTGCA	0.43	rs7205345	0.49
20452FSTP21T1	GTA0048862	rs7229946	20452FSTP21T1_A01	E4	AG	A	G	TGGAGGTTGCAGTGAGCTGAGATTACACCACTGCATTCCAGCCTGTGYGACACAGTGCGACTCCATCTTAAAAAAAAAAAAAGAAAGGTAAAACTACCAAACAAAAAAATGAAAGAAGGAAACATCCAGCAAACATGTAAAGTGTGAGAG[A/G]TAAATAAGAATATAAAATCACAGAAGACTGCTTTATCCAAGTCTGCCCATCAGAGTGATTTGCCCGGTTGCCCCCATTCAGAGCCTTCTTTACAGTGAAATGTAAAGTGCTGCAACTTTAGGATATGGTTACAAGAAAATGGTTAAAGGT	CAGCAAACATGTAAAGTGTGAGAGA	CAGCAAACATGTAAAGTGTGAGAGG	CGGGCAAATCACTCTGATGGG	AATGAAAGAAGGAAACATCCAGCA	0.38	rs7229946	0.45
20452FSTP21T1	GTA0118009	rs7845219	20452FSTP21T1_A01	F4	CT	C	T	TACYCCTGGCACCCAATCTTTTCATCTCAGCAAAGACTCAGATAATAAAAATCTGACTTTAAATAAGCTACAGTTGTAGAATGCTGATCTGCCCCAAACATTCATTCACATGGGAGTTATTCTTTGGGCTTCGTGTTCCATTATTCTGAA[C/T]GTTTACTGGCCTATTGAAACTAGAGCTCCACAATAGGGGTATCAATGGCATCAGGGAAGGCCATATTGTCCTAAAACACTTCTATAAGATTCCATCTCCATTCATTTGGGAGAAGATCCATTGGGAATTCATCCACCTGGCTTCAAAAAG	GGCTTCGTGTTCCATTATTCTGAAC	GGCTTCGTGTTCCATTATTCTGAAT	CCCTGATGCCATTGATACCCCT	ACATGGGAGTTATTCTTTGGGC	0.46	rs7845219	0.48
20452FSTP21T1	GTA0252797	rs8017377	20452FSTP21T1_A01	G4	AG	A	G	GCTTTCCCTTTGGAGGATTGCTCACGATGGGGCTGCCCTTCCCTCTTCCATCTGTTTTGGTGTAGGTTGGACACTGACATTGGCAACTTCCTGAAGGTGTGGAAGACCCTTCCTCCCAGCTCAGCCAGTGTCACTGAGCTGAGTGATGAC[A/G]CTGACTCTGGGCCCCTGGAGAGTCTGCCGAATATGGAAGAAGTCAGGGAAGAGAAGGAGGAGAGGCAGGATGAGGAGCAGAGACAGGGGCAGGGCACACAGAAGGCGGCTGAGGAGGACGACCTTGACTCTTCGCTGGCGTCAGTGTTCA	GTCACTGAGCTGAGTGATGACA	TCACTGAGCTGAGTGATGACG	GGCAGACTCTCCAGGGGC	CTCCCAGCTCAGCCAGT	0.6	rs8017377*	0.44
20452FSTP21T1	GTA0051485	rs849135	20452FSTP21T1_A01	H4	AG	A	G	GTCTCAGCCCCATAGTTTCTGATTTCGTAGGTGTGGGGCAAGAGGACACAGTGTTGAGAATCTGCACATCTAATACAATAATCCAGAAAATACTGCTGCTGCTTGTCCAGAGACCACTCTTGGAGACCACTGCTCTATAAGCAAGAGTAC[A/G]TCACCAAGAAATTTAAATTCAGATCCTAGAACTAGAACACTACCAAGCAAGGGGGGAAATCATTCTTATGAGACAGTCATTGAATGAATGCATGAATCAAAGGGCAGATAAATACCTTCTCTTCCATCATATGCTACATTTCCCATATTT	CCACTGCTCTATAAGCAAGAGTACA	CCACTGCTCTATAAGCAAGAGTACG	CCCCCCTTGCTTGGTAGTGT	CCAGAGACCACTCTTGGAGAC	0.42	rs849135	0.49
11996STP19O1	GTA0250529	rs933585	11996STP19O1_A01	F6	AG	A	G	GGGCAAGAGCAAGGTTTCAGTAGTTATCAAAAATGTTCTAATAGTAAACTCTAYCCATGTTGACATTCTAGTCTCATCCTTATTTTTTGTTTAATTAATT[A/G]TACTTTATAAACTCATCATCTGATCAGAGGTGTTTATAAACATGGCAACATGCAAGTATAGAAACTTGAAAGCAAAAACAACTAAGAATGTACCATTTGA	CACCTCTGATCAGATGATGAGTTTATAAAGTAT	ACCTCTGATCAGATGATGAGTTTATAAAGTAC	CCATGTTGACATTCTAGTCTCATCCT	GCATGTTGCCATGTTTATAAACACC	0.29	rs933585#	0.48
20452FSTP21T1	GTA0059246	rs9606186	20452FSTP21T1_A01	A5	CG	C	G	CTCAGCCCCTCTGCAGACACRAGCCTGCCCAGATGAGAAGCACCACCCTCCCAGAGCATCTGGAGCCGGTCGCTGCTTCAKACAAGGCCAAGAGGTTCCATGATCAGAGCAGGGTCTGTCATANAAGGCTGGGCAACCTGCCCAACACCT[C/G]CATCAGAGCCTAGCGTCTGCCATGAGAAGGCTGCACTTATCTTTGCAGCCACCTCCACCTTCCTAGGCAGGCAAGGCWGCAGAGAGTGTACTTGGAGTGTCATGTCTCTCCACACCCTGGCCCTGCAGATGCCCCACAGACAGGTCTAGA	CAGACGCTAGGCTCTGATGG	AGACGCTAGGCTCTGATGC	GGCAACCTGCCCAACACC	GCAAAGATAAGTGCAGCCTTCTC	0.62	rs9606186	0.42
11996STP19O1	GTA0136747	rs9644862	11996STP19O1_A01	H6	GT	G	T	CCCATTTGTCAATTTTGGCTTTTGTTGCCATTGCTTTTGGTGTTTTAGACATGAAGTCCTTGCCCATGCCTATGTCCTGAATGGTATTGCCTAGGTTTTY[G/T]TCTAGGGTTTTTATGGTTTTAGGTCTAACATTTAAGTCTTTAATCCATCTTGAACTAATTTTTGTATAAGGTATAAGGAAARGATCCAGTTTCAGCTTTC	GTTAGACCTAAAACCATAAAAACCCTAGAC	TGTTAGACCTAAAACCATAAAAACCCTAGAA	GCCTATGTCCTGAATGGTATTGCC	AAGATGGATTAAAGACTTAAATGTTAGACCT	0.4	rs9644862	0.45
20452FSTP21T1	GTA0048886	rs985492	20452FSTP21T1_A01	B5	CT	C	T	GGAGGGTAGATTTATCCACCAAACAGTGTTGGAAGTAAAAGGAGCTCCTCAGCCAAACAATTTTTTCTTCTCCTTTAATCAAAGGAGCCAGTTTTTCCTCCTCTAAACCAAGGGAGCAGTGGAAGAGAAATGCCCAAAAGACTTCAGGAA[C/T]ACCAATCAAGGCCAACATATAGTGAAGCAGGTTGTGGCATGGTCCTCTGGGCTCACCTCVTGCAAACAGCACAGATAACTCTTGCAGGCAGCCCTSTGCAGAGGAAAGATGGCATGAGGAGGAGGAGAGAGTAGGGCTTCATTCGGTAGT	AAATGCCCAAAAGACTTCAGGAAC	GAAATGCCCAAAAGACTTCAGGAAT	CCATGCCACAACCTGCTTCA	ACCAAGGGAGCAGTGGAA	0.45	rs985492*	0.47
20452FSTP21T1	GTA0118012	rs9936385	20452FSTP21T1_A01	C5	CT	C	T	TTTATTCATTAGTAACTTGGTTGATTTAATGAAAATAGTTTTAAAAGGCATACTGAAGCACAGTAAAACCTAAGGCTCACATCACTGTCTGGGGAGTCAGTGAGGAACAGGGCAGAGTGCCAGTGCATATGAAGAGGGATTTTTTTGCCT[C/T]CTTGGTTCACTGCATATTCCCAGTAATTSGAACAATGCCTGACATGAAGTAGACATAAAATAATTACTGAATGAAAGTGGAAAGGAAAGTATACTTAGTCTCTGCTTTCATGGAGCTTATATGCTAGTGGGAGAGAGACAAAAATTAAGT	GGGAATATGCAGTGAACCAAGG	TGGGAATATGCAGTGAACCAAGA	GCAGAGTGCCAGTGCATATGAA	TCTACTTCATGTCAGGCATTGTTC	0.48	rs9936385	0.39
20452FSTP21T1	GTA0120914	rs9951171	20452FSTP21T1_A01	D5	AG	A	G	TAGTCCAGAGCACAGAAAATCTATACTTTTAATAGCTTGGACTGCACACAACAGTAAGTCTTTATAGACGGTTCTGTCCTGTAGGGGAGAAAAGTCCTCGTTGTTCCTCTGGGATGCAACATGAGAGAGCAGCACACTGAGGCTTTATGG[A/G]TTGCCCTGCCACAAGTGAACAGGTCCCAGCATGAAAGCAGGGACAAGAAAATTGAGCTCGTGACCTCCGTCCRGTGGGCCCTTTGATTCATTCTTTCTTTTYGTCTCACTGTGTCATCATATCTCCCTGAACTCAGCTCCAGATTGAAAC	AGCACACTGAGGCTTTATGGA	AGCACACTGAGGCTTTATGGG	TCATGCTGGGACCTGTTCACT	TCTGGGATGCAACATGAGAGA	0.53	rs9951171	0.43
* denotes the 10 different homozygous variants detected in patient 1; # denotes the 7 different homozygous variants detected in patient 2.
rs521861 was used in case report
